# Supplementary material
Source: Elsevier journal article supplement (https://publikationen.ub.uni-frankfurt.de/opus4/files/37042/mmc2.doc)
Supplement: mmc2 [file mmc2.doc]

**Supplementary Material I. Quotations from CN Studies: Universalism and Culture**

| **Universalism and Culture** | | | | | | |
| --- | --- | --- | --- | --- | --- | --- |
|  |  |  | **Author/Year** | **Journal** | **Quotation I** | **Quotation II** |
|  |  |  |  |  |  |  |
|  | **Resemblance** | |  |  |  |  |
|  |  |  |  |  |  |  |
|  |  | **Phenotypic** |  |  |  |  |
|  |  |  |  |  |  |  |
|  |  |  | Adams, Rule et al. 2010 | J Cogn Neurosci | "This suggests that participants may have used more self-oriented simulation when reading the minds of same- versus other cultural group members' eyes." |  |
|  |  |  | Chiao, Iidaka et al. 2008 | J Cogn Neurosci | "Heightened bilateral amygdala response may indicate heightened arousal to or vigilance for fear expressed by members of one's own cultural group because this expression serves as an indicator of impending threat (Glascher and Adolphs 2003, Davis and Walen 2001). More specifically fear perceived in a member of one's own cultural group may be interpreted as more likely to indicate danger for one's self compared to fear perceived in a member from another cultural group (Elfenbein and Ambady 2002)." | "Given the role of central nucleus of the amygdala in producing a fear response, we speculate the cultural specificity in amygdala activity to fear faces demonstrated in the current study could also reflect an enhanced arousal for (Anderson and Phelps 2001) or physiological preparedness (Phelps and Ledoux 2005, Ledoux 1996) to respond to fear expressed by a member of one's own cultural group." |
|  |  |  | Derntl, Habel et al. 2009 | BMC Neurosci | "Furthermore, the better performance for in-group expressions of happiness and sadness, emotions that have a strong social aspect, could possibly be driven by stronger empathy for in-group faces. Higher accuracy for out-group expressions of disgust and anger, two negative and complex emotions in part indicating avoidance, might be especially important when expressed by out-group posers thus eliciting more attention." | "Thus, the amygdala's role appears to be of particular importance in retrieving socially relevant knowledge on the basis of facial appearance." |
|  |  |  | Derntl, Habel et al. 2009 | Soc Neurosci | "No such association was found in Asians, suggesting that novelty aspects (Caucasian faces depicting Western expressions of emotions) might be stronger when confronted with foreign expressions of emotions, exerting higher activation in emotion sensitive and relevance detecting areas such as the amygdale: probably reflecting one neural substrate of the 'alien-effect'." |  |
|  |  |  | Golby, Gabrieli et al. 2001 | Nat Neurosci | "It is possible that in the present study, greater attention was paid to same-race faces than to other-race faces, thereby leading to greater fusiform activation and superior memory for the same-race faces." |  |
|  |  |  | Hart, Whalen et al. 2000 | Neuroreport | "Thus, this study was explicitly designed to assess fMRI responses to outgroup vs ingroup faces across subjects of both races, rather than to assess any differences that might exist between subjects based upon race." | "These areas, along with the amygdala, might represent elements of a brain system that functions to increase encoding of biologically relevant facial or social characteristics as a function of information value or experience (Whalen et al., 1998)." |
|  |  |  | Krill and Platek 2009 | Front Evol  Neurosci | "Results indicated that activation in the ACC varies as a function of resemblance to the participant when individuals are excluded. Activation in the ACC increased during exclusion conditions as the other players facial resemblance to the participants increased." | "However, in the same-race condition the players may represent persons who are members of the same social group, and whom might share genes in common with the participants." |
|  |  |  | Lieberman, Hariri et al. 2005 | Nat Neurosci | "One intriguing possibility suggested by these results is that verbal processing of race diminishes the experience of threat and thus might be reinforcing. In other words, the controlled processes invoked by verbal stereotyping may provide some degree of emotional relief from the threat associated with the presence of negatively stereotyped group members, and thus may have promoted the further development of verbal stereotypes. Such a dynamic may have been useful during our evolution to allow controlled processing responses to threat to override automatic responses, but may now contribute to the ubiquitous development of intergroup stereotyping." |  |
|  |  |  | Phelps, Cannistraci et al. 2003 | Neuropsychologia | "Given what is known about the neural systems of social group face processing, one possibility is that the amygdala activation response to Black versus White faces is related to differences in the perceptual processing of same versus other race faces. It has been demonstrated that for both White and Black Americans, outgroup, or other race faces will lead to less activation of the fusiform face area (FFA) (Golby et al., 2001)." | "First, the amygdala response to social group information derived from faces appears to be automatic." |
|  |  |  | Richeson, Todd et al. 2008 | Group Process  Intergroup Relat | "Furthermore, a recent examination of neural activity as a function of skin tone revealed that the right amygdala was more active for light and darker skinned Black targets as well as for darker skinned White targets, relative to light-skinned White targets (Ronquillo et al., 2007). The present study, therefore, corroborates this work, finding that differential amygdala activity to outgroup, compared with ingroup, targets is more robust in the right amygdala." | "Confirming our prediction, Black targets elicited greater amygdala activity compared with White targets (i.e. Black > White) only when the targets displayed direct gaze. [...] Signaling the emotional status or behavioral intentions of conspecifics, gaze cues alert perceivers to possible threat or danger, particularly when the self is the object of others' attention." |
|  |  |  | Richeson, Baird et al. 2003 | Nat Neurosci | "As interracial contact becomes increasingly unvoluntary, therefore, the present results suggest that haboring racial bias may be maladaptive to optimal cognitive functioning." |  |
|  |  |  | Rilling, Dagenais et al. 2008 | Neuroimage | "If the default mode is involved in simulating the mental perspective of others, we might expect it to be more active when the subject is interacting with an in-group partner who is like them and can therefore more easily be simulated, compared to an out-group partner (Mitchell et al., 2005)." |  |
|  |  |  | Ronquillo, Denson et al. 2007 | Soc Cogn  Affect Neurosci | "These findings suggest that individuals may be judged based on the extent to which they manifest a group's phenotypic features, and that this process is mediated in part by affective responses to phenotypic features. Our findings support (albeit indirectly) this prior work by showing that the amygdala is sensitive to variation in racial phenotypic features (i.e. skin tone). Thus, automatic responses to racial phenotypic features may be primarily affective in nature, as the amygdala is a primitive affect processing brain structure." | "Our data suggest that Afrocentric features may be enough to produce an automatic, negative affective response toward individuals possessing this phenotype, regardless of their racial category." |
|  |  |  | Rule, Freeman et al. 2009 | Soc Cogn  Affect Neurosci | "The results of the participant culture by target culture interaction presented evidence for an outgroup effect such that participants had a stronger amygdala response to opposite-culture faces than they did to same-culture faces. This effect is consistent with a host of previous studies that have found increased amygdala activation to the faces of outgroup versus ingroup members." | "This may be particularly applicable to the current study, in which the outgroup faces differed not only in race but also in nationality and culture (Chiao and Ambady, 2007)." |
|  |  |  | Van Bavel, Packer et al. 2008 | Psychol Sci | "In the current study, in-group biases in neural activity were not moderated by race; however, in contexts in which race provides the most salient group distinction, attitudes, cultural stereotypes (especially threat), and personal values (egalitarianism) may provide the most relevant motivational guides to perception, evaluation, and behavior." |  |
|  |  |  | Xu, Zuo et al. 2009 | J Neurosci | "More interestingly, we found neuroimaging evidence for modulation of empathic neural responses by racial group membership, i.e., ACC empathic responses to perception of others in pain decreased remarkably when participants viewed faces of racial in-group members relative to racial out-group members. This effect was comparable in Caucasian and Chinese subjects and suggests that modulations of empathic neural responses by racial group membership are similar in different ethnic groups." | "It appears that, relative to cultural influence on empathy, if any, the modulation of empathy by racial group membership is more fundamental and plays a more pivotal role in shaping social behaviors." |
|  |  |  |  |  |  |  |
|  |  | **Constructed** |  |  |  |  |
|  |  |  |  |  |  |  |
|  |  |  | Kobayashi, Glover et al. 2007 | Brain Res | "Specifically, the bilateral vmPFC showed activity during ToM tasks in all the task groups regardless of linguistic or cultural backgrounds. [...] Thus, the culture- and language-independent activity in this area found in our study reinforces the effects of the 'higher order' socio-emotional function (see Damasio, 1994, and Stuss and Benson, 1986 for reviews) throughout the ToM development." |  |
|  |  |  | Rilling, Dagenais et al. 2008 | Neuroimage | "These differences in brain activity for in-group and out-group interactions are potential neural substrates for the human tendency to more readily identify with in-group members and more readily distrust, fear and discriminate against out-group members." | "Subjects with strong initial in-group-out-group biases may activate anterior insula more when playing with out-group partners and this, in turn, may bias them to defect more often with out-group partners" |
|  |  |  | Rule, Freeman et al. 2009 | Soc Cogn  Affect Neurosci | "Thus, the amygdala response observed in the current work might well reflect participants' inclination to vote for candidates whom they found to be more salient or arousing. Indeed, related work examining amygdala response to politicians found that participants expressed a greater amygdala response to the faces of candidates who agreed with their political ideology over the faces of candidates who did not agree with their political ideology (Knutson et al., 2006). Those authors interpreted their effects as possibly reflecting a relevance-based response whereby salient stimuli provoked a greater response in the amygdala. Indeed, this may serve to explain the basis for individuals' preferences for candidates based on perceptions of their faces in the current study, as well." |  |
|  |  |  | Van Bavel, Packer et al. 2008 | Psychol Sci | "People who accurately identify, value, and cooperate with ingroup members enjoy numerous functional benefits, including the fulfillment of their basic psychological needs (Allport, 1954; Correll and Park, 2005). The value humans place on group membership is illustrated by the ease with which humans form groups and favor in-group members." | "By virtue of their motivational significance in a variety of contexts (e.g., economic, psychological, and evolutionary), in-group members often warrant greater, or deeper, processing than outgroup members (Brewer, 1979, 1999)." |
|  |  | |  |  |  |  |
|  | **Stereotypes** | |  |  |  |  |
|  |  |  |  |  |  |  |
|  |  |  | Chiao, Iidaka et al. 2008 | J Cogn Neurosci | "The currents results suggest that previous findings of greater amygdala activity for out-group neutral faces may reflect cultural knowledge of negative stereotypes specifically about African-Americans rather than general negative stereotypes about other out-group members [...] In support of this view, Lieberman et al 2005 found that African-American participants also show greater amygdala response to African-American neutral faces, suggesting that amygdala response is due to cultural knowledge of negative stereotypes about African-Americans, rather than automatic negative arousal to out-group members per se" |  |
|  |  |  | Cunningham, Johnson et al. 2004 | Psychol Sci | "This difference in amygdala activation was stronger the higher participants' racial bias on the IAT. These results, combined with previous investigations of intergroup attitudes, suggest that implicit negative associations to a social group may result in an automatic emotional response when encountering members of that group. Yet when participants had the opportunity to process Black and White faces for 525 ms (and reported seeing the faces), we observed activity differences not in the amygdala, but in areas of PFC (BA 47 and 9) and anterior cingulate (BA 32)—areas associated with inhibition, conflict, and control (Beauregard et al., 2001; MacDonald et al., 2000; Ochsner et al., 2002)." | "Greater Black-White difference in amygdala activation in the 30-ms condition than in the 525-ms condition is consistent with the idea that unwanted prejudicial responses are most likely to occur under conditions of distraction or cognitive overload, when reflective cognitive processes that might modulate an automatically activated evaluation are otherwise engaged (Pendry and Macrae, 1999)." |
|  |  |  | Derntl, Habel et al. 2009 | BMC Neuroscience | "[...] moreover, stereotypes associated with Asian vs. AA faces might differ, in particular regarding perceived threat and increased aggressiveness, e.g. Phelps et al., 2000, probably also accounting for differences in the observed activation patterns" |  |
|  |  |  | Hart, Whalen et al. 2000 | Neuroreport | "Indeed, the observed difference in habituation profile to outgroup stimuli is consistent with the notion that the amygdala might be sensitive to learned racial stereotypes or participate in their development." |  |
|  |  |  | Knutson, Mah et al. 2007 | Hum Brain Mapp | "Alternatively, insular activation may be due partly to unpleasant feelings such as disgust (Krolak-Salmon et al., 2003; Wicker et al., 2003) experienced when white participants are presented with stereotypically black male names." |  |
|  |  |  | Lieberman, Hariri et al. 2005 | Nat Neurosci | "One intriguing possibility suggested by these results is that verbal processing of race diminishes the experience of threat and thus might be reinforcing. In other words, the controlled processes invoked by verbal stereotyping may provide some degree of emotional relief from the threat associated with the presence of negatively stereotyped group members, and thus may have promoted the further development of verbal stereotypes. Such a dynamic may have been useful during our evolution to allow controlled processing responses to threat to override automatic responses, but may now contribute to the ubiquitous development of intergroup stereotyping." | "[...] the present study suggests that the amygdala activity typically associated with race-related processing may be a reflection of culturally learned negative associations regarding African-American individuals." |
|  |  |  | Phelps, O'Connor et al. 2000 | J Cogn Neurosci | "Our own interpretation is that both amygdala activation as well as behavioral responses of race bias are reflections of social learning within a specific culture at a particular moment in the history of relations between social groups. Specifically, the influences that predict such responses (both brain and behavior) may include knowledge of cultural evaluations of social groups, personal experience with social group members, and one's own group membership." | "We propose that the variability in the response of the amygdala to Black compared with White faces in Experiment 1 is likely to be a reflection of culturally acquired knowledge about social groups filtered through individual experience. We expected that the greater amygdala activity in response to unfamiliar Black faces is the result of a general learned negative evaluation of Black Americans (Adolphs, 1998; Fiske, 1998)." |
|  |  |  | Richeson, Baird et al. 2003 | Nat Neurosci | "Specifically, the extent to which white individuals reveal bias on an unobstrusive measure of racial attitudes predicts the interference they exhibit on the Stroop color-naming task after interacting with black, but not white, individuals." | "Moreover, previous research shows that white individuals with higher levels of racial bias are particularly likely to activate negative stereotypes automatically upon exposure to black faces (Lepore, 1997)." |
|  |  |  | Rilling, Dagenais et al. 2008 | Neuroimage | "[...] subjects reporting that they did not discriminate showed stronger DLPFC activation during in-group interactions, suggesting that they may have exerting cognitive effort to override discriminatory tendencies" |  |
|  |  |  | Ronquillo, Denson et al. 2007 | Soc Cogn  Affect Neurosci | "(…) individuals may evaluate members of their own racial group through the lens of another group's racial stereotype if the target possesses physical features typical of that group (Blair et al., 2002; 2004b)." | "However, as mentioned earlier, our study does not discount the possibility of category-based stereotyping (i.e. judgments guided by semantic associations with racial categories)." |
|  |  |  | Van Bavel, Packer et al. 2008 | Psychol Sci | "Amygdala activity among White participants may reflect negative stereotypes toward Blacks [...]" |  |
|  |  |  | Wheeler and Fiske 2005 | Psychol Sci | "People instantly categorize other people on the basis of social distinctions such as race, gender, and age. Such rapid and even automatic responses direct much of human cognition and behavior. The sensory and social world bombards people with information, so such adaptive shortcuts efficiently use their limited mental resources." | "Although the current experiments focused on racial stereotyping by White American participants, other research shows that both Blacks and Whites tend to categorize their respective out-group (Fiske, 1998; Hart et al., 2000) and that prejudices extend to other categories, including other ethnic, gender, and age groups." |
|  |  | |  |  |  |  |
|  | **Familiarity** | |  |  |  |  |
|  |  |  |  |  |  |  |
|  |  |  | Adams, Rule et al. 2010 | J Cogn Neurosci | "(…) we demonstrate a clear intracultural advantage mirrored by culturally tuned bilateral pSTS responses to mental state decoding from the eyes." |  |
|  |  |  | Chiao, Iidaka et al. 2008 | J Cogn Neurosci | "Given the prior behavioral evidence indicating cultural variation in how fear is expressed, we suggest that greater experience with and exposure to a particular set of facial expressions of fear (e.g. Japanese or Caucasian) may sensitize the amygdala to optimally respond to facial configurations of fear specific to one's own cultural group by adulthood (Marsh et al. 2003, Skuse et al. 2003)" |  |
|  |  |  | Cunningham, Johnson et al. 2004 | Psychol Sci | "One potential contributor to amygdala activity is the ease with which stimuli can be processed and discriminated. Golby, Gabrieli, Chiao, and Eberhardt (2001) showed that same-race faces activate the fusiform gyrus—an area associated with perceptual expertise (Gauthier, Tarr, Anderson, Skudlarski, and Gore, 1999)—more than other-race faces do. This result suggests that same-race faces may have an advantage in early visual processing. Our results are consistent with this idea in that we found that participants' IAT scores correlated significantly with greater bilateral fusiform activation for White relative to Black faces in the 30-ms condition." |  |
|  |  |  | Demorest, Morrison et al. | Soc Cogn  Affect Neurosci | "The increased levels of activation we observed associated with culturally unfamiliar music listening and recall coupled with subjects' less successful recognition of these examples suggests that listeners do indeed employ familiar listening strategies when encountering 'other' musics, though in ways that are neither efficient nor effective." |  |
|  |  |  | Derntl, Habel et al. 2009 | BMC Neuroscience | "To further characterize these emotion dependent performance differences, the frequency and quality of contact with members of other ethnic groups, as well as sympathy ratings for the presented faces, should be considered as these might modulate neural activation and performance." | "However, authors also discuss the upper lip retraction as a sign for 'extended disgust', which might be stronger influenced by cultural background and also harder to recognize." |
|  |  |  | Derntl, Habel et al. 2009 | Soc Neurosci | "Due to the fact that our Asian subjects have only been in Europe for a short time (mean: 6.1 months), emotion discrimination of Caucasian expressions may pose a greater challenge for them, as Western faces might show higher ambiguity and intensity in their expressions than familiar Asian faces (see also Elfenbein, Beaupre, Levesque, and Hess, 2007)." | "(…) Elfenbein and Ambady (2002) describe the 'alien-effect', whereby people who have just moved to live with another ethnic group show initial difficulties in accurately recognizing emotions in the faces of members of this new group." |
|  |  |  | Goh, Chee et al. 2007 | Cogn Affect  Behav Neurosci | "The finding that, during passive viewing of pictures, both elderly East Asians and elderly Westerners showed decreased binding in the right hippocampus and right parahippocampal gyrus compared with young adults suggests that experience (in the form of cultural exposure, for example) may play only a relatively modest role in moderating the binding process and that biological mechanisms associated with the aging process may play a larger role in decreasing older adults' ability to engage medial temporal structures for binding to the same degree that young adults do." |  |
|  |  |  | Golby, Gabrieli et al. 2001 | Nat Neurosci | "Differential recruitment of face-processing areas in the fusiform region by faces of different races may be due to differences in perceptual expertise derived from long-term differences in exposure to same-race and other-race faces." | "From a young age, people usually have much more experience with faces from their own racial group (Chance et al., 1982). Such variation in social experience may contribute importantly to the development of visual expertise with faces." |
|  |  |  | Hart, Whalen et al. 2000 | Neuroreport | "Our current results are consistent with this concept, to the extent that subjects may be less familiar with outgroup vs ingroup faces in a categorical sense." | "Thus, the pattern of amygdala recruitment presented here parallels a more rapid familiarization of subjects with ingroup vs outgroup face stimuli." |
|  |  |  | Knutson, Mah et al. 2007 | Hum Brain Mapp | "This activation also is consistent with a low frequency effect in visual orthographic processing for the names (Kronbichler et al., 2004), as the black names were less familiar than the white names used in this study, while the male and females names were of equal familiarity." |  |
|  |  |  | Morrison, Demorest et al. 2003 | Neuroimage | "Using fMRI we compared the activation patterns of professional musicians and untrained controls reared in the United States as they listened to music from their culture (Western) and from an unfamiliar culture (Chinese)." |  |
|  |  |  | Nan, Knosche et al. 2008 | Hum Brain Mapp | "When comparing the processing of culturally familiar to culturally unfamiliar music, we observe increased activity in parts of the motor system, demonstrating the possible existence of a human echo neuron system for music and strengthening the idea of sensori-motor coactivation during the perception of music (…). Increased activity of the ventro-medial prefrontal cortex by culturally familiar music is in line with previous reports attributing a function regarding the 'feeling of knowing' or 'perceived ease of information retrieval' (i.e. familiarity) to this area (…)." |  |
|  |  |  | Phelps, O'Connor et al. 2000 | J Cogn Neurosci | "These results suggest that the amygdala's response to Black faces in White subjects is not observed when they are familiar and positively regarded. With this data, however, we cannot distinguish responses due purely to familiarity from those due to positive evaluation, independent of familiarity. In fact, these two factors may be difficult to untangle because of the documented role of familiarity in producing positive evaluation (Kunst-Wilson and Zajonc, 1980)." | "If the results of Experiment 1 reflect a learned negative evaluation of the group, the pattern of results from Experiment 1 should disappear when presenting exemplars of Black Americans who are as familiar and well liked as White Americans." |
|  |  |  | Phelps, Cannistraci et al. 2003 | Neuropsychologia | "It has been suggested that the FFA responds to greater expertise in processing faces (Gauthier et al., 1999), and that we tend to be less 'expert' at processing other race faces. In other words, the diminished FFA response to other race faces may be the result of less expertise in processing outgroup faces (Golby et al., 2001). It is possible that the impoverished neural processing of other race faces leads to some subtle ambiguity or uncertainty in response to these faces. The amygdala may be particularly sensitive to uncertainty in the environment because it may signal potential danger (Whalen et al., 1998). [...] Consistent with this hypothesis, Phelps et al. (2000) did not observe amygdala activation to highly familiar Black versus White faces." |  |
|  |  |  | Richeson, Todd et al. 2008 | Group Process  Intergroup Relat | "But why do outgroup targets displaying direct gaze trigger an elevated amygdala response? One candidate explanation is that the amygdala is signaling the presence of an unfamiliar stimulus that has acquired additional emotional significance through prior learning or experience (e.g. Olsson et al., 2005). That is, the amygdala is tagging a potentially important emotional stimulus in the environment, a stimulus that is made salient through cultural forces that reflect the current status of intergroup relations." |  |
|  |  |  | Rule, Freeman et al. 2009 | Soc Cogn  Affect Neurosci | "One explanation offered for these outgroup effects is that the amygdala is highly responsive to novel stimuli, such as the faces of outgroup members (Dubois et al., 1999; Phelps et al., 2001; Van Bavel et al., 2008)." | "This may be particularly applicable to the current study, in which the outgroup faces differed not only in race but also in nationality and culture (Chiao and Ambady, 2007)." |

**Supplementary Material II. Quotations from CN Studies: Differentialism and Culture**

| **Differentialism and Culture** | | | | | | |
| --- | --- | --- | --- | --- | --- | --- |
|  |  |  | **Author/Year** | **Journal** | **Quotation I** | **Quotation II** |
|  |  |  |  |  |  |  |
|  | **Biological explanatory models** | | | | |  |
|  |  |  |  |  |  |  |
|  |  |  | Chiao, Iidaka et al. 2008 | J Cogn Neurosci | "notes: the term 'race' is used here to refer to a social group whose members share a common ethnic heritage and a subset of physical attributes (e.g. skin tone, facial and body shape (Bonham et al. 2005)) similar to nationality race is a type of social group membership that also does not necessarily involve shared cultural experience, values, practices or believes (e.g. Japanese Americans and Native Japanese belong to the same racial group but do not necessarily have similar cultural experiences)." | "The observed amygdala bias for own culture fear faces may result from neural tuning to subtle variations in fear expressions over the course of development." |
|  |  |  | Gutchess, Welsh et al. 2006 | Cogn Affect  Behav Neurosci | "[...] the narrower lens for the Americans may correspond more closely to a single target object. This type of focus would explain the special status of objects in cognitive processing (Davenport and Potter, 2004), as well as our finding of more distinct processing of objects for Americans." |  |
|  |  |  | Kobayashi, Glover et al. 2006 | Brain Lang | "Thus, there may be something in Japanese culture that demands more response inhibition for processing ToM than in American culture." |  |
|  |  |  | Moriguchi, Ohnishi et al. 2005 | Neuroreport | "We propose that a template-matching process for facial recognition might be related to the 'mirror neuron' system. (…) During observation of fearful faces, we propose that Japanese subjects may utilize a template matching system to identify the type of emotion expressed, whereas Caucasian subjects may more directly recognize faces as 'fearful', thus inducing stronger emotional responses. One would argue that the different brain activity patterns in the present study may reflect racial difference of visual processing pattern rather than that of emotional recognition patterns." | "Conclusion: The results of the present study demonstrated a different neural basis in facial recognition, particularly the recognition of fear expressions, in Caucasian and Japanese individuals, and suggest that we need to reconsider the validity of the theory of the universality of facial expression and recognition." |
|  |  |  | Okuyemi, Powell et al. 2006 | Addict Biol | "If these ﬁndings can be replicated, they may provide additional insights into for differential cessation outcomes among various ethnic groups. Studies are needed to examine factors contributing to variations in brain responses observed between AA and CC smokers in this study." |  |
|  |  |  | Ronquillo, Denson et al. 2007 | Soc Cogn  Affect Neurosci | "One theory of racial bias states that White Eurocentric phenotypic characteristics (e.g. lighter skin and eye color, longer and straighter hair, narrower nose and thinner lips) are preferable to features toward the opposite end of the continuum (e.g. darker skin, kinkier hair, broader nose and fuller lips; Maddox, 2004)." | "Our data suggest that Afrocentric features may be enough to produce an automatic, negative affective response toward individuals possessing this phenotype, regardless of their racial category." |
|  |  |  | Zhang, Zhou et al. 2006 | Sci China C Life Sci | "It should be noted that since the Western independent self does not include mother (Markus and Kitayama, 1991) we expect that mother would not share medial prefrontal gyrus with the self for the Westerner." |  |
|  |  |  | Zhu, Zhang et al. 2007 | Neuroimage | "The results suggest that Western independent self is mediated by unique neural substrates, whereas East Asian (e.g., Chinese here) interdependent self depends on overlapping of neural substrates for the self and close others." | "The additional brain structures linked to self- and mother-judgments, in Chinese, compared with Western individuals, provide further neuroimaging evidence for the interdependent self formed by East Asian culture." |
|  |  | | | | | |
|  | **Culturally acquired knowledge** | | | | | |
|  |  |  |  |  |  |  |
|  |  | **Self** **concepts** | |  |  |  |
|  |  |  |  |  |  |  |
|  |  |  | Chiao, Harada et al. 2009 | Hum Brain Mapp | "Our results provide converging evidence of the notion that distinct neural representations of self between individualists and collectivists observed in prior cultural neuroscience studies are not likely due to inherently neural differences between Westeners and East Asians, but instead reflect cultural values of individualism and collectivism that are endorsed by the individual, a process that is susceptible to dynamic influences across macro- and micro-time scales (e.g., ontogeny and situation, respectively)" | "As a means for adapting to culturally diverse social environments, bicultural individuals may rely more on or psychologically "switch" between either and individualistic or collectivistic cultural schema to a greater extent in order to think and behave in manner congruent with their current sociocultural context (Hong et al., 2000). |
|  |  |  | Chiao, Harada et al. 2009 | J Cogn Neurosci | "An intriguing aspect of the current findings is that participants' cultural values (eg, individualism and collectivism), and not necessarily their cultural affiliation (eg being caucasian-american or native Japanese), modulated neural response within MPFC during self-judgements" | "Here we provide direct evidence that cultural values of individualism and collectivism influence neural mechanisms underlying the self" |
|  |  |  | Han, Mao et al. 2008 | Soc Neurosci | "Similarly, the current work observed increased activation in VMPFC related to self-judgment in non-religious participants. As VMPFC functions to label stimuli as self-referential or to represent stimulus self-relevance (…) our fMRI results suggest that self-referential processing in non-religious participants was characterized by enhanced coding of the self-relatedness of stimuli. In contrast, VMPFC activity linked to self-judgment was surprisingly eliminated in Christian participants, indicating that the coding process of stimulus self-relatedness was weakened. This is the first neural consequence of Christian beliefs and practices on self-referential processing. (…) It follows that the increased DMPFC activity linked to the self-referential processing in Christian participants indicates that religious beliefs and practices enhance the evaluative process of self-related stimuli mainly from God's perspective, and this represents the second neural consequence of Christian beliefs and practices on self-referential processing." | "If Christian participants mainly took God's perspective to evaluate self-related stimuli, as indexed by the enhanced DPMFC activity and subjective reports, then it is reasonable to assume that, relative to non-religious participants, religious beliefs in Christians promote inhibition of other aspects of self-related processing (such as retrieval from episodic memory and self-reflection based on experience), at least when compared with the processing referential to religious and government leaders." |
|  |  |  | Kobayashi, Glover et al. 2007 | Brain Res | "Increasing evidence from socio-psychological studies suggests that Japanese and other Asian cultures encourage the use of group-agency more than individualistic self-agency to account for various kinds of human behaviors (Ames et al., 2001; Nisbett, 2003). The diminished activity in the TPJ area in Japanese adults and children during the ToM tasks might represent the demoted sense of self-other distinction in the Japanese culture." |  |
|  |  |  | Kobayashi, Glover et al. 2008 | Soc Cogn  Affect Neurosci | "Although throughout this article the results have been interpreted in terms of linguistic effects on neural bases of ToM, these results could equally be attributed to cultural effects since our participants were bicultural as well as bilingual. [...] Westerners have been shown to view the world more analytically, while Easterners tend to view the world more holistically (Nisbett, 2003). These differences in the world view seem to affect one's self construal (Markus and Kitayama, 1991) and other social cognition and perception including ToM and perspective-taking (Lehman et al., 2004; Wu and Keysar, 2007)." |  |
|  |  |  | Moriguchi, Ohnishi et al. 2005 | Neuroreport | "The paracentral lobule (aSPR; Fig. 1e) was more activated in Caucasians than in Japanese. This area has been reported to respond to increased visual attention (Connolly et al., 2000; Culham et al., 2001). In some behavioral studies, Asians appear to attend more to the field and Westerners more to salient objects (Nisbett and Masuda, 2003). If Caucasian subjects in our study attended more to fearful faces and some special facial parts of the task stimuli (e.g. contracted eyebrows, stretched mouth etc.), they directed their attention to various parts of fearful faces more than Japanese subjects, resulting in the activation in aSPR, although this is not beyond speculation." |  |
|  |  |  | Rule, Freeman et al. 2009 | Soc Cogn  Affect Neurosci | "Importantly, this does not mean that perceivers from both cultures were considering the same traits when making their judgments. Previous work has observed that American and Japanese voters value different traits in their leaders (e.g. Misumi and Peterson, 1985), the former favoring traits related to power and the latter favoring traits related to warmth (Rule et al., in press)." |  |
|  |  |  | Sui and Han 2007 | Psychol Sci | "This change in self-awareness was observed in an implicitly self-related task in which self-awareness was susceptible to prior stimulation emphasizing different perspectives on the culture-dependent self." | "We modulated self-awareness through a priming task that highlighted an independent or interdependent perspective on the self." |
|  |  |  | Van Bavel, Packer et al. 2008 | Psychol Sci | "[...] amygdala activity among Black participants (who generally have a stronger racial identity and may therefore view Black faces as more relevant than White faces; Crocker, Luhtanen, Blaine, and Broadnax, 1994) may reflect increased processing of in-group members." |  |
|  |  |  | Zhang, Zhou et al. 2006 | Sci China C Life Sci | "It should be noted that since the Western independent self does not include mother (Markus and Kitayama, 1991) we expect that mother would not share medial prefrontal gyrus with the self for the Westerner." | "This results provide strong evidence that the Chinese self includes mother" |
|  |  |  | Zhu, Zhang et al. 2007 | Neuroimage | "The additional brain structures linked to self- and mother-judgments, in Chinese, compared with Western individuals, provide further neuroimaging evidence for the interdependent self formed by East Asian culture." | "The results suggest that Western independent self is mediated by unique neural substrates, whereas East Asian (e.g., Chinese here) interdependent self depends on overlapping of neural substrates for the self and close others." |
|  |  |  | | |  |  |
|  |  | **Regional/national practices and specificities** | | |  |  |
|  |  |  |  |  |  |  |
|  |  |  | Derntl, Habel et al. 2009 | Soc Neurosci | "[...] showed differences in the neural processing of fearful faces between Caucasian and Japanese subjects that also seemed to affect the amygdale response. Caucasians exhibited a significantly greater activation of the left amygdale during presentation of fearful faces than Japanese subjects, and the authors suggest that the threatening effect of these facial stimuli varied between cultures, with Caucasians demonstrating a stronger reaction." | "While strong expressions of disgust might be sanctioned in Western cultures, Eastern raters might find them especially difficult, in particular in light of the fact that Asians generally show less intense negative emotions." |
|  |  |  | Goh, Chee et al. 2007 | Cogn Affect  Behav Neurosci | "We hypothesized that due to prolonged experience within an object-biased culture, elderly Westerners would show greater engagement of object-processing areas than did the elderly East Asians from the Chee et al. study. Specifically, we expected the elderly Westerners to show greater object-processing activity in the lateral occipital areas than the elderly East Asians. We also predicted, on the basis of behavioural findings of cross-cultural differences, that older Westerners would show less activity in the background processing areas than older East Asians." | "Perhaps because the present paradigm is comparatively subtle, cultural differences became apparent only in older subjects who had had more exposure to their respective cultural environments than the young subjects had had. This is a plausible explanation, since there is substantial evidence that neuro-anatomical changes in the brain are related to the length of time individuals spend being engaged in specific behavioural practices and sensory environments." |
|  |  |  | Golby, Gabrieli et al. 2001 | Nat Neurosci | "The present finding shows that functional brain imaging can provide insights into how variation in social experience may guide the organization of neural systems that process faces encountered on a daily basis." | "As a racial minority in the US, African Americans may have a stronger racial identity than do European Americans (Phinney, 1992), and this may be associated with enhanced memory for same-race faces." |
|  |  |  | Gron, Schul et al. 2003 | Eur J Neurosci | "German subjects begin initial learning of the abstract geometric patterns by trying to encode them as complete figures in the sense of a 'Gestalt'. With repetitive exposition to the patterns, the subjects try to enhance the spatial resolution of the information to be learned by engagement of dorsal regions specialized in visuo-spatial processing during perception and learning. [...]. For the Chinese subjects the reverse mechanism is possibly in use. Owing to their cultural upbringing and training in the analysis of complex visuo-spatial information they begin by engaging their well-trained dorsal system of visuo-spatial information processing. With subsequent repetitions of the material they try to reduce affinity to inferences by engaging ventral processing areas in order to synthesize the already spatially well-resolved information into complete and holistic figures in the sense of a 'Gestalt'." | "In conclusion, irrespective of behavioural performance cultural imprinting of neural substrate extends beyond language-related cognition and determines spatial- and object-related processing during an episodic memory task." |
|  |  |  | Gutchess, Welsh et al. 2006 | Cogn Affect  Behav Neurosci | "Different information-processing biases across cultures could result from environmental affordances present in one's daily environment. Eastern environments contain more objects than do American environments, which may make the distinction between object and background less clear for East Asians (Miyamoto et al., 2006). Boduroǧlu et al. (2005) have suggested that East Asians may attend more broadly to their environment, so that their frame of reference may include several objects." | "[...] Westerners engage the middle temporal gyrus more than do East Asians to accomplish semantic processing of complex scenes. In contrast, East Asians may conduct more perceptual processing via the fusiform to encode pictures, without extensive activation of property-specific, semantic-processing regions." |
|  |  |  | Hedden, Ketay et al. 2008 | Psychol Sci | "Many ideas and practices prevalent in American cultural contexts require separating objects from their contexts and making independent or absolute judgments. In contrast, many ideas and practices prevalent in East Asian cultural contexts require connecting objects to their contexts and making interdependent or relative judgments (Nisbett et al., 2001). The present results provide evidence that cultural differences in the preferred and encouraged judgment style powerfully influence brain function, completely reversing the relation between task and activation across a widespread brain network. Individuals who had habitually engaged in American cultural contexts exhibited greater activation during the culturally nonpreferred relative task, whereas individuals who had habitually engaged in East Asian cultural contexts exhibited greater activation during the culturally nonpreferred absolute task." | "(…) the best explanation for members of the two cultures exhibiting increased activation in opposite task conditions is that each culture exhibits a preferred processing mode (relative for East Asians, absolute for Americans)." |
|  |  |  | Kobayashi, Glover et al. 2007 | Brain Res | "The opposite contrast (Japanese cartoon minus American cartoon) revealed more brain activity in left aSTS/TP. However, since the American monolingual group had more activity in the same area during the story ToM task than the bilingual group, the difference in this area may reflect some difference in the ways in which verbal and nonverbal ToM tasks are processed during childhood (rather than being a cultural difference)." | "Also, a recent brain imaging study found a correlation between fear-related emotion and brain activity in the IFG area in Japanese adults but not in Caucasian adults (Moriguchi et al., 2005). Thus, it is possible that the stronger activity in the IFG region reflects the culturally unique style of understanding some emotional aspects of verbal ToM." |
|  |  |  | Phelps, O'Connor et al. 2000 | J Cogn Neurosci | "From preliminary IAT data it appears that Black Americans show more favorable evaluations of Blacks than do White Americans. However, they do not show as strong an in-group preference as White subjects. We take this finding to show that Black Americans' own indirect evaluations may be determined in part by the larger culture's negative evaluation of their group (Banaji, in press)." |  |
|  |  |  | Tang, Zhang et al. 2006 | Proc Natl  Acad Sci U S A | "The different biological encoding of numbers may be shaped by visual reading experience during language acquisition and other cultural factors such as mathematics learning strategies and education systems, which cannot be explained completely by the differences in languages per se." |  |
|  |  |  | |  |  |  |
|  |  | **Language system** | |  |  |  |
|  |  |  |  |  |  |  |
|  |  |  | Kobayashi, Glover et al. 2006 | Brain Res | "Since we also found slightly more activity in the homologous area in the left hemisphere in the Japanese group during the cartoon task, the difference in these areas may reflect some culture-specific way(s) of understanding ToM that are related to language or pragmatics." | "It is possible that the Japanese ToM task demanded orthography-related semantic analyses more than the English ToM task for children." |
|  |  |  | Kobayashi, Glover et al. 2007 | Brain Lang | "Thus, more activity in these areas could mean that English (as a language) requires more syntactical computation or verbal memory on ToM than Japanese." | "Thus, it can be hypothesized that the ventro-medial right IFG is more important for processing ToM specific to Japanese language." |
|  |  |  | Siok, Perfetti et al. 2004 | Nature | "(…) functional disruption of the left middle frontal gyrus is associated with impaired reading of the Chinese language (a logographic rather than alphabetic writing system)." |  |
|  |  |  | Tang, Zhang et al. 2006 | Proc Natl  Acad Sci U S A | "These two different language systems (Chinese and English) can shape the way to process non-language-related content. Number processing differs in those with Chinese and English backgrounds." |  |
